# Supplementary material
Source: MDPI journal article supplement (https://www.mdpi.com/2072-4292/14/22/5773)
Supplement: s1 [file s1]

**Table S1** Statistics of four metrics from 1991 to 2021

| Year | Index                             | PC1    | PC2    | PC3    | PC4    |
|------|-----------------------------------|--------|--------|--------|--------|
| 1991 | NDVI                              | 0.654  | 0.554  | -0.274 | 0.437  |
|      | Wet                               | 0.275  | -0.577 | 0.467  | 0.612  |
|      | NDSI                              | -0.697 | 0.204  | -0.200 | 0.658  |
|      | LST                               | -0.109 | 0.565  | 0.817  | -0.042 |
|      | Covariance eigenvalue of each PC  | 0.018  | 0.002  | 0.001  | 0.000  |
|      | Percent covariance eigenvalue (%) | 83.81  | 10.23  | 4.50   | 1.46   |
| 1992 | NDVI                              | 0.605  | 0.587  | -0.238 | 0.482  |
|      | Wet                               | 0.390  | -0.571 | 0.546  | 0.474  |
|      | NDSI                              | -0.653 | -0.003 | -0.176 | 0.736  |
|      | LST                               | -0.234 | 0.574  | 0.784  | -0.018 |
|      | Covariance eigenvalue of each PC  | 0.028  | 0.004  | 0.002  | 0.000  |
|      | Percent covariance eigenvalue (%) | 82.42  | 11.74  | 4.78   | 1.06   |
| 1993 | NDVI                              | 0.671  | 0.493  | -0.444 | 0.330  |
|      | Wet                               | 0.204  | -0.315 | 0.526  | 0.764  |
|      | NDSI                              | -0.682 | 0.151  | -0.451 | 0.555  |
|      | LST                               | -0.206 | 0.797  | 0.568  | -0.008 |
|      | Covariance eigenvalue of each PC  | 0.022  | 0.002  | 0.001  | 0.000  |
|      | Percent covariance eigenvalue (%) | 86.75  | 9.27   | 3.11   | 0.87   |
| 1994 | NDVI                              | 0.653  | 0.494  | -0.386 | 0.424  |
|      | Wet                               | 0.231  | -0.335 | 0.658  | 0.633  |
|      | NDSI                              | -0.683 | 0.089  | -0.334 | 0.644  |
|      | LST                               | -0.231 | 0.797  | 0.553  | -0.069 |
|      | Covariance eigenvalue of each PC  | 0.021  | 0.003  | 0.001  | 0.000  |
|      | Percent covariance eigenvalue (%) | 84.58  | 10.77  | 3.57   | 1.08   |
| 1995 | NDVI                              | 0.619  | 0.552  | -0.171 | 0.531  |
|      | Wet                               | 0.370  | -0.518 | 0.697  | 0.331  |
|      | NDSI                              | -0.632 | -0.052 | -0.069 | 0.770  |
|      | LST                               | -0.282 | 0.651  | 0.693  | -0.126 |
|      | Covariance eigenvalue of each PC  | 0.026  | 0.005  | 0.002  | 0.000  |
|      | Percent covariance eigenvalue (%) | 79.92  | 14.15  | 4.93   | 1.00   |
| 1996 | NDVI                              | 0.669  | 0.533  | -0.202 | 0.478  |
|      | Wet                               | 0.282  | -0.455 | 0.732  | 0.421  |
|      | NDSI                              | -0.616 | 0.017  | -0.191 | 0.764  |
|      | LST                               | -0.304 | 0.714  | 0.622  | -0.107 |
|      | Covariance eigenvalue of each PC  | 0.027  | 0.004  | 0.001  | 0.000  |
|      | Percent covariance eigenvalue (%) | 82.71  | 12.28  | 4.13   | 0.88   |
| 1997 | NDVI                              | 0.621  | 0.516  | -0.364 | 0.464  |
|      | Wet                               | 0.283  | -0.324 | 0.719  | 0.546  |
|      | NDSI                              | -0.663 | -0.021 | -0.277 | 0.695  |
|      | LST                               | -0.307 | 0.793  | 0.524  | -0.060 |
|      | Covariance eigenvalue of each PC  | 0.029  | 0.005  | 0.001  | 0.000  |
|      | Percent covariance eigenvalue (%) | 81.30  | 13.71  | 4.15   | 0.84   |
| 1998 | NDVI                              | 0.584  | 0.471  | -0.475 | 0.460  |
|      | Wet                               | 0.290  | -0.210 | 0.722  | 0.592  |
|      | NDSI                              | -0.686 | -0.092 | -0.293 | 0.660  |

|      |                                   |        |        |        |        |
|------|-----------------------------------|--------|--------|--------|--------|
|      | LST                               | -0.325 | 0.852  | 0.409  | -0.037 |
|      | Covariance eigenvalue of each PC  | 0.028  | 0.005  | 0.001  | 0.000  |
|      | Percent covariance eigenvalue (%) | 81.48  | 13.90  | 3.83   | 0.78   |
| 1999 | NDVI                              | 0.609  | 0.541  | -0.345 | 0.466  |
|      | Wet                               | 0.347  | -0.356 | 0.716  | 0.490  |
|      | NDSI                              | -0.639 | -0.053 | -0.220 | 0.735  |
|      | LST                               | -0.316 | 0.760  | 0.566  | -0.050 |
|      | Covariance eigenvalue of each PC  | 0.027  | 0.004  | 0.001  | 0.000  |
|      | Percent covariance eigenvalue (%) | 83.53  | 11.22  | 4.43   | 0.82   |
| 2000 | NDVI                              | 0.660  | 0.524  | -0.387 | 0.375  |
|      | Wet                               | 0.270  | -0.225 | 0.726  | 0.591  |
|      | NDSI                              | -0.585 | -0.055 | -0.381 | 0.714  |
|      | LST                               | -0.387 | 0.819  | 0.421  | -0.029 |
|      | Covariance eigenvalue of each PC  | 0.024  | 0.003  | 0.001  | 0.000  |
|      | Percent covariance eigenvalue (%) | 83.56  | 11.53  | 4.18   | 0.72   |
| 2001 | NDVI                              | 0.673  | 0.506  | -0.447 | 0.304  |
|      | Wet                               | 0.213  | -0.168 | 0.627  | 0.730  |
|      | NDSI                              | -0.591 | -0.043 | -0.523 | 0.612  |
|      | LST                               | -0.390 | 0.845  | 0.365  | -0.006 |
|      | Covariance eigenvalue of each PC  | 0.027  | 0.003  | 0.001  | 0.000  |
|      | Percent covariance eigenvalue (%) | 85.26  | 10.47  | 3.66   | 0.61   |
| 2002 | NDVI                              | 0.671  | 0.518  | -0.377 | 0.373  |
|      | Wet                               | 0.280  | -0.232 | 0.740  | 0.566  |
|      | NDSI                              | -0.580 | -0.035 | -0.353 | 0.734  |
|      | LST                               | -0.369 | 0.822  | 0.431  | -0.044 |
|      | Covariance eigenvalue of each PC  | 0.022  | 0.004  | 0.001  | 0.000  |
|      | Percent covariance eigenvalue (%) | 79.82  | 15.57  | 3.88   | 0.73   |
| 2003 | NDVI                              | 0.690  | 0.523  | -0.313 | 0.389  |
|      | Wet                               | 0.300  | -0.280 | 0.780  | 0.473  |
|      | NDSI                              | -0.547 | -0.032 | -0.280 | 0.788  |
|      | LST                               | -0.366 | 0.804  | 0.464  | -0.056 |
|      | Covariance eigenvalue of each PC  | 0.019  | 0.004  | 0.001  | 0.000  |
|      | Percent covariance eigenvalue (%) | 78.30  | 16.75  | 4.20   | 0.75   |
| 2004 | NDVI                              | 0.567  | 0.551  | -0.309 | 0.529  |
|      | Wet                               | 0.368  | -0.336 | 0.767  | 0.404  |
|      | NDSI                              | -0.645 | -0.123 | -0.135 | 0.742  |
|      | LST                               | -0.356 | 0.754  | 0.545  | -0.086 |
|      | Covariance eigenvalue of each PC  | 0.021  | 0.004  | 0.001  | 0.000  |
|      | Percent covariance eigenvalue (%) | 78.94  | 14.99  | 5.10   | 0.97   |
| 2005 | NDVI                              | 0.608  | 0.529  | -0.319 | 0.498  |
|      | Wet                               | 0.302  | -0.405 | 0.697  | 0.509  |
|      | NDSI                              | -0.681 | -0.009 | -0.220 | 0.699  |
|      | LST                               | -0.276 | 0.745  | 0.603  | -0.069 |
|      | Covariance eigenvalue of each PC  | 0.023  | 0.003  | 0.001  | 0.000  |
|      | Percent covariance eigenvalue (%) | 82.15  | 12.01  | 4.92   | 0.92   |
| 2006 | NDVI                              | 0.642  | 0.510  | -0.393 | 0.416  |
|      | Wet                               | 0.264  | -0.307 | 0.681  | 0.611  |
|      | NDSI                              | -0.651 | -0.001 | -0.352 | 0.673  |

|      |                                   |        |        |        |        |
|------|-----------------------------------|--------|--------|--------|--------|
|      | LST                               | -0.308 | 0.803  | 0.509  | -0.030 |
|      | Covariance eigenvalue of each PC  | 0.022  | 0.003  | 0.001  | 0.000  |
|      | Percent covariance eigenvalue (%) | 83.37  | 11.70  | 4.24   | 0.69   |
| 2007 | NDVI                              | 0.632  | 0.495  | -0.403 | 0.439  |
|      | Wet                               | 0.255  | -0.281 | 0.707  | 0.596  |
|      | NDSI                              | -0.654 | -0.042 | -0.346 | 0.671  |
|      | LST                               | -0.327 | 0.821  | 0.466  | -0.027 |
|      | Covariance eigenvalue of each PC  | 0.027  | 0.004  | 0.001  | 0.000  |
|      | Percent covariance eigenvalue (%) | 84.56  | 11.35  | 3.39   | 0.69   |
| 2008 | NDVI                              | 0.531  | 0.488  | -0.480 | 0.500  |
|      | Wet                               | 0.252  | -0.190 | 0.724  | 0.614  |
|      | NDSI                              | -0.709 | -0.164 | -0.314 | 0.610  |
|      | LST                               | -0.391 | 0.836  | 0.383  | -0.033 |
|      | Covariance eigenvalue of each PC  | 0.022  | 0.004  | 0.001  | 0.000  |
|      | Percent covariance eigenvalue (%) | 82.88  | 13.42  | 3.01   | 0.69   |
| 2009 | NDVI                              | 0.631  | 0.559  | -0.312 | 0.437  |
|      | Wet                               | 0.276  | -0.315 | 0.737  | 0.530  |
|      | NDSI                              | -0.623 | -0.027 | -0.298 | 0.723  |
|      | LST                               | -0.369 | 0.766  | 0.520  | -0.076 |
|      | Covariance eigenvalue of each PC  | 0.028  | 0.003  | 0.001  | 0.000  |
|      | Percent covariance eigenvalue (%) | 85.17  | 10.68  | 3.39   | 0.76   |
| 2010 | NDVI                              | 0.573  | 0.603  | -0.302 | 0.465  |
|      | Wet                               | 0.341  | -0.339 | 0.726  | 0.491  |
|      | NDSI                              | -0.634 | -0.080 | -0.235 | 0.732  |
|      | LST                               | -0.391 | 0.718  | 0.571  | -0.077 |
|      | Covariance eigenvalue of each PC  | 0.030  | 0.003  | 0.001  | 0.000  |
|      | Percent covariance eigenvalue (%) | 85.32  | 9.89   | 4.13   | 0.66   |
| 2011 | NDVI                              | 0.614  | 0.469  | -0.485 | 0.411  |
|      | Wet                               | 0.244  | -0.213 | 0.669  | 0.669  |
|      | NDSI                              | -0.693 | -0.018 | -0.371 | 0.618  |
|      | LST                               | -0.290 | 0.857  | 0.423  | -0.045 |
|      | Covariance eigenvalue of each PC  | 0.030  | 0.004  | 0.001  | 0.000  |
|      | Percent covariance eigenvalue (%) | 84.48  | 11.76  | 3.21   | 0.55   |
| 2012 | NDVI                              | 0.692  | 0.393  | -0.445 | 0.411  |
|      | Wet                               | 0.249  | -0.241 | 0.725  | 0.595  |
|      | NDSI                              | -0.633 | -0.004 | -0.350 | 0.691  |
|      | LST                               | -0.242 | 0.887  | 0.392  | -0.018 |
|      | Covariance eigenvalue of each PC  | 0.033  | 0.005  | 0.002  | 0.000  |
|      | Percent covariance eigenvalue (%) | 81.41  | 13.38  | 4.70   | 0.51   |
| 2013 | NDVI                              | 0.726  | 0.388  | -0.417 | 0.385  |
|      | Wet                               | 0.261  | -0.206 | 0.768  | 0.547  |
|      | NDSI                              | -0.571 | -0.043 | -0.347 | 0.743  |
|      | LST                               | -0.282 | 0.897  | 0.340  | -0.005 |
|      | Covariance eigenvalue of each PC  | 0.038  | 0.005  | 0.002  | 0.000  |
|      | Percent covariance eigenvalue (%) | 84.59  | 10.83  | 4.21   | 0.36   |
| 2014 | NDVI                              | 0.693  | 0.503  | -0.286 | 0.430  |
|      | Wet                               | 0.299  | -0.411 | 0.718  | 0.476  |
|      | NDSI                              | -0.581 | -0.010 | -0.273 | 0.767  |

|      |                                   |        |        |        |        |
|------|-----------------------------------|--------|--------|--------|--------|
|      | LST                               | -0.305 | 0.760  | 0.573  | -0.017 |
|      | Covariance eigenvalue of each PC  | 0.039  | 0.004  | 0.002  | 0.000  |
|      | Percent covariance eigenvalue (%) | 85.85  | 9.36   | 4.37   | 0.42   |
| 2015 | NDVI                              | 0.701  | 0.449  | -0.376 | 0.406  |
|      | Wet                               | 0.253  | -0.268 | 0.748  | 0.552  |
|      | NDSI                              | -0.588 | -0.036 | -0.352 | 0.728  |
|      | LST                               | -0.315 | 0.851  | 0.419  | -0.010 |
|      | Covariance eigenvalue of each PC  | 0.039  | 0.004  | 0.002  | 0.000  |
|      | Percent covariance eigenvalue (%) | 86.90  | 8.77   | 3.95   | 0.38   |
| 2016 | NDVI                              | 0.651  | 0.502  | -0.318 | 0.473  |
|      | Wet                               | 0.303  | -0.419 | 0.697  | 0.497  |
|      | NDSI                              | -0.633 | -0.030 | -0.262 | 0.727  |
|      | LST                               | -0.289 | 0.756  | 0.587  | -0.009 |
|      | Covariance eigenvalue of each PC  | 0.038  | 0.003  | 0.002  | 0.000  |
|      | Percent covariance eigenvalue (%) | 88.05  | 7.08   | 4.46   | 0.41   |
| 2017 | NDVI                              | 0.657  | 0.416  | -0.449 | 0.440  |
|      | Wet                               | 0.279  | -0.226 | 0.747  | 0.559  |
|      | NDSI                              | -0.634 | -0.080 | -0.313 | 0.703  |
|      | LST                               | -0.298 | 0.877  | 0.377  | -0.001 |
|      | Covariance eigenvalue of each PC  | 0.035  | 0.003  | 0.002  | 0.000  |
|      | Percent covariance eigenvalue (%) | 87.72  | 7.63   | 4.28   | 0.37   |
| 2018 | NDVI                              | 0.648  | 0.490  | -0.370 | 0.450  |
|      | Wet                               | 0.332  | -0.310 | 0.752  | 0.477  |
|      | NDSI                              | -0.600 | -0.091 | -0.252 | 0.754  |
|      | LST                               | -0.332 | 0.810  | 0.484  | -0.005 |
|      | Covariance eigenvalue of each PC  | 0.039  | 0.004  | 0.002  | 0.000  |
|      | Percent covariance eigenvalue (%) | 86.67  | 8.19   | 4.79   | 0.35   |
| 2019 | NDVI                              | 0.676  | 0.525  | -0.287 | 0.430  |
|      | Wet                               | 0.315  | -0.388 | 0.730  | 0.466  |
|      | NDSI                              | -0.573 | -0.042 | -0.268 | 0.773  |
|      | LST                               | -0.339 | 0.757  | 0.559  | -0.017 |
|      | Covariance eigenvalue of each PC  | 0.036  | 0.003  | 0.002  | 0.000  |
|      | Percent covariance eigenvalue (%) | 87.70  | 7.42   | 4.56   | 0.32   |
| 2020 | NDVI                              | 0.679  | 0.475  | -0.358 | 0.430  |
|      | Wet                               | 0.273  | -0.287 | 0.759  | 0.518  |
|      | NDSI                              | -0.591 | -0.064 | -0.316 | 0.740  |
|      | LST                               | -0.340 | 0.829  | 0.443  | -0.011 |
|      | Covariance eigenvalue of each PC  | 0.033  | 0.003  | 0.002  | 0.000  |
|      | Percent covariance eigenvalue (%) | 87.50  | 7.87   | 4.32   | 0.32   |
| 2021 | NDVI                              | 0.678  | 0.493  | -0.323 | 0.439  |
|      | Wet                               | 0.292  | -0.387 | 0.713  | 0.507  |
|      | NDSI                              | -0.609 | -0.008 | -0.283 | 0.741  |
|      | LST                               | -0.290 | 0.779  | 0.555  | -0.018 |
|      | Covariance eigenvalue of each PC  | 0.034  | 0.003  | 0.002  | 0.000  |
|      | Percent covariance eigenvalue (%) | 86.83  | 7.80   | 4.97   | 0.40   |
